# Supplementary material for: A General One-Pot Approach to Synthesize Binary and Ternary Metal Sulfide Nanocrystals
Source: Nanoscale Res Lett. 2019 Jan 11;14:19. doi: 10.1186/s11671-019-2856-7 (PMC6329689; doi:10.1186/s11671-019-2856-7)
Supplement: Supplementary file 1 — Figure S1. The XPS signals of (a) Full-scan and (b) Cu 2p for CdS:Cu NCs with different Cu doping levels. (DOCX 162 kb) [file 11671_2019_2856_MOESM1_ESM.docx]

**Supporting Information**

**A General One-pot Approach to Synthesize Binary and Ternary Metal Sulfide Nanocrystals**

Chao Xiong1, Mingrui Liu2, Xifang Zhu1, Aiwei Tang2*

1 School of Electrical and Photoelectronic Engineering, Changzhou Institute of Technology, Changzhou, 213032, China

2Key Laboratory of Luminescence and Optical Information, Ministry of Education, School of Science, Beijing Jiao Tong University, Beijing 100044, China;

Email addresses for all authors:

Chao Xiong, Email: [xiongc@czu.cn](mailto:xiongc@czu.cn)

Mingrui Liu, Email: [17121678@bjtu.edu.cn](mailto:17121678@bjtu.edu.cn)

Xifang Zhu, Email: zhuxf@czu.cn

Aiwei Tang, Email: [awtang@bjtu.edu.cn](mailto:awtang@bjtu.edu.cn)

* Corresponding author (email: [awtang@bjtu.edu.cn](mailto:awtang@bjtu.edu.cn))

**Figure S1**

**
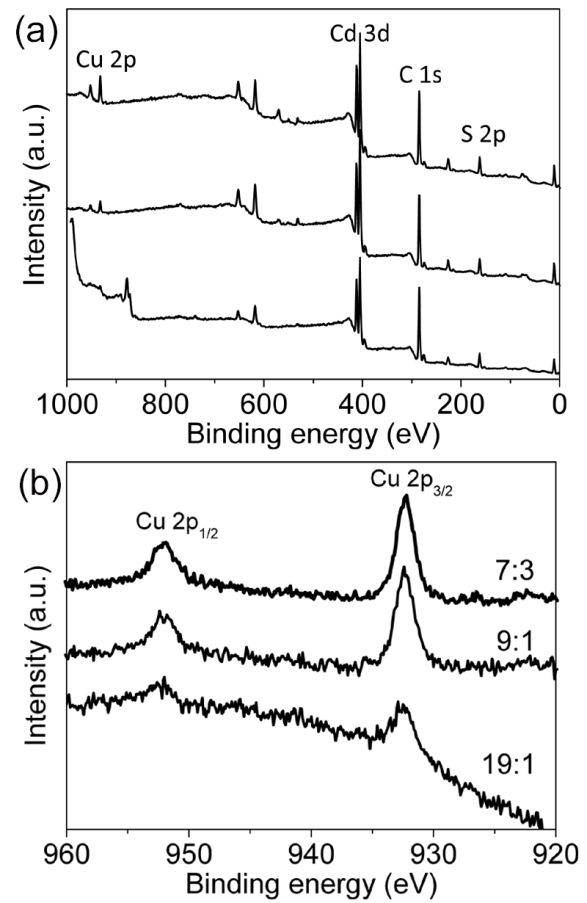
**

**Figure S1** The XPS signals of (a) Full-scan and (b) Cu 2p for CdS:Cu NCs with different Cu doping levels.
